# Supplementary material for: A unified evolutionary origin for the ubiquitous protein transporters SecY and YidC
Source: PubMed Central journal article supplement (PMC8675477; doi:10.1186/s12915-021-01171-5), 2021-12-15
Supplement: 12915_2021_1171_MOESM2_ESM.pdf [file 12915_2021_1171_MOESM2_ESM.pdf]

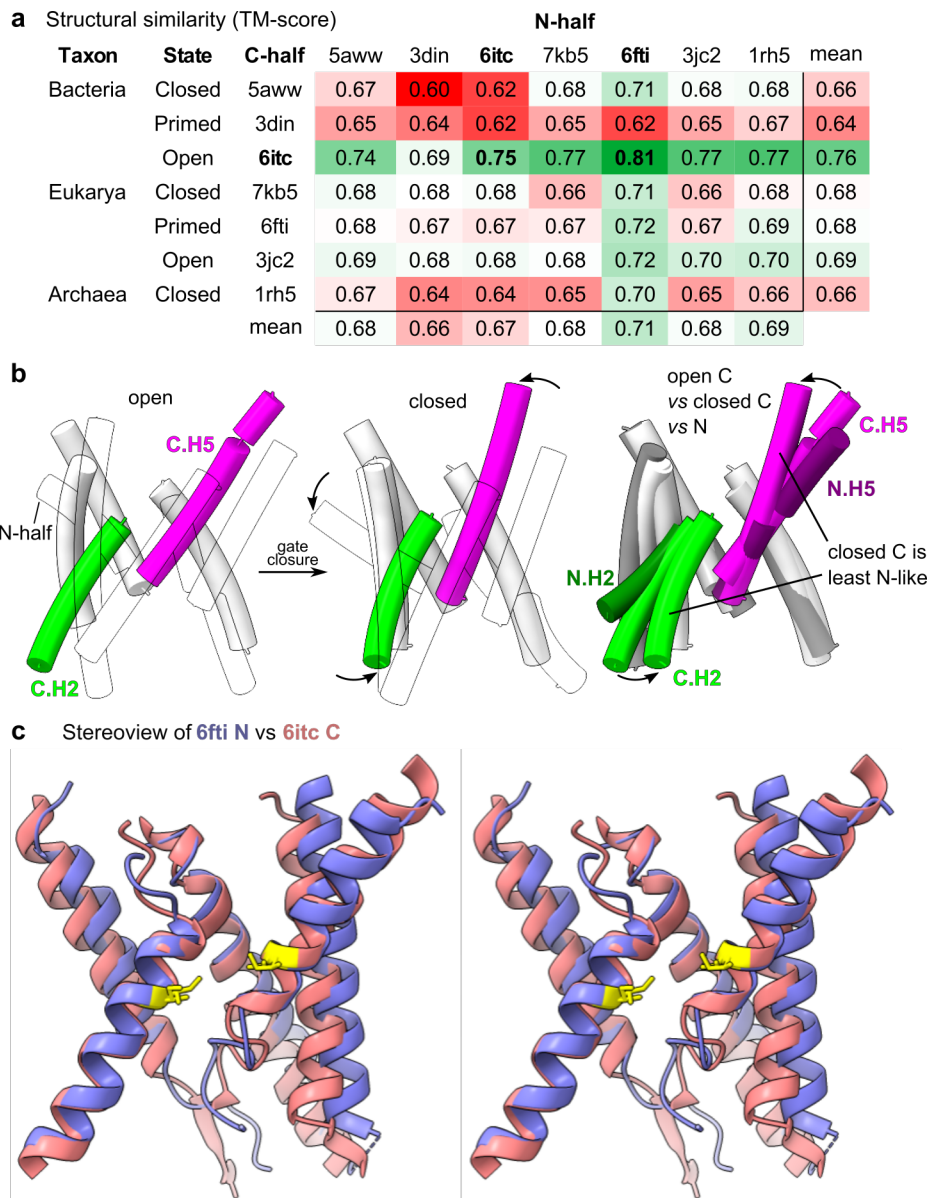

**Figure S1: Structural similarity and symmetry breaking between SecY halves. a** Pairwise comparisons of the SecY halves by TM-score. TM-scores can range from 0 to 1. Boldface scores indicate the most similar pair from the same structure (6itc) or from any structure (6itc C, 6fti N). **b** Symmetry-breaking tilts in C.H2 and C.H5 induced by channel closure. At left, the TMHs from open (5aww) and closed (6itc) models are shown, with the N-half rendered in transparent outline. At right is a superposition of closed (5aww) and open C-halves (6itc) and an N-half (6itc). All models were aligned by H1/4. **c** Walleye stereoview of the most similar pair of N- and C-halves. The pore ring residues are shown as sticks and highlighted yellow.

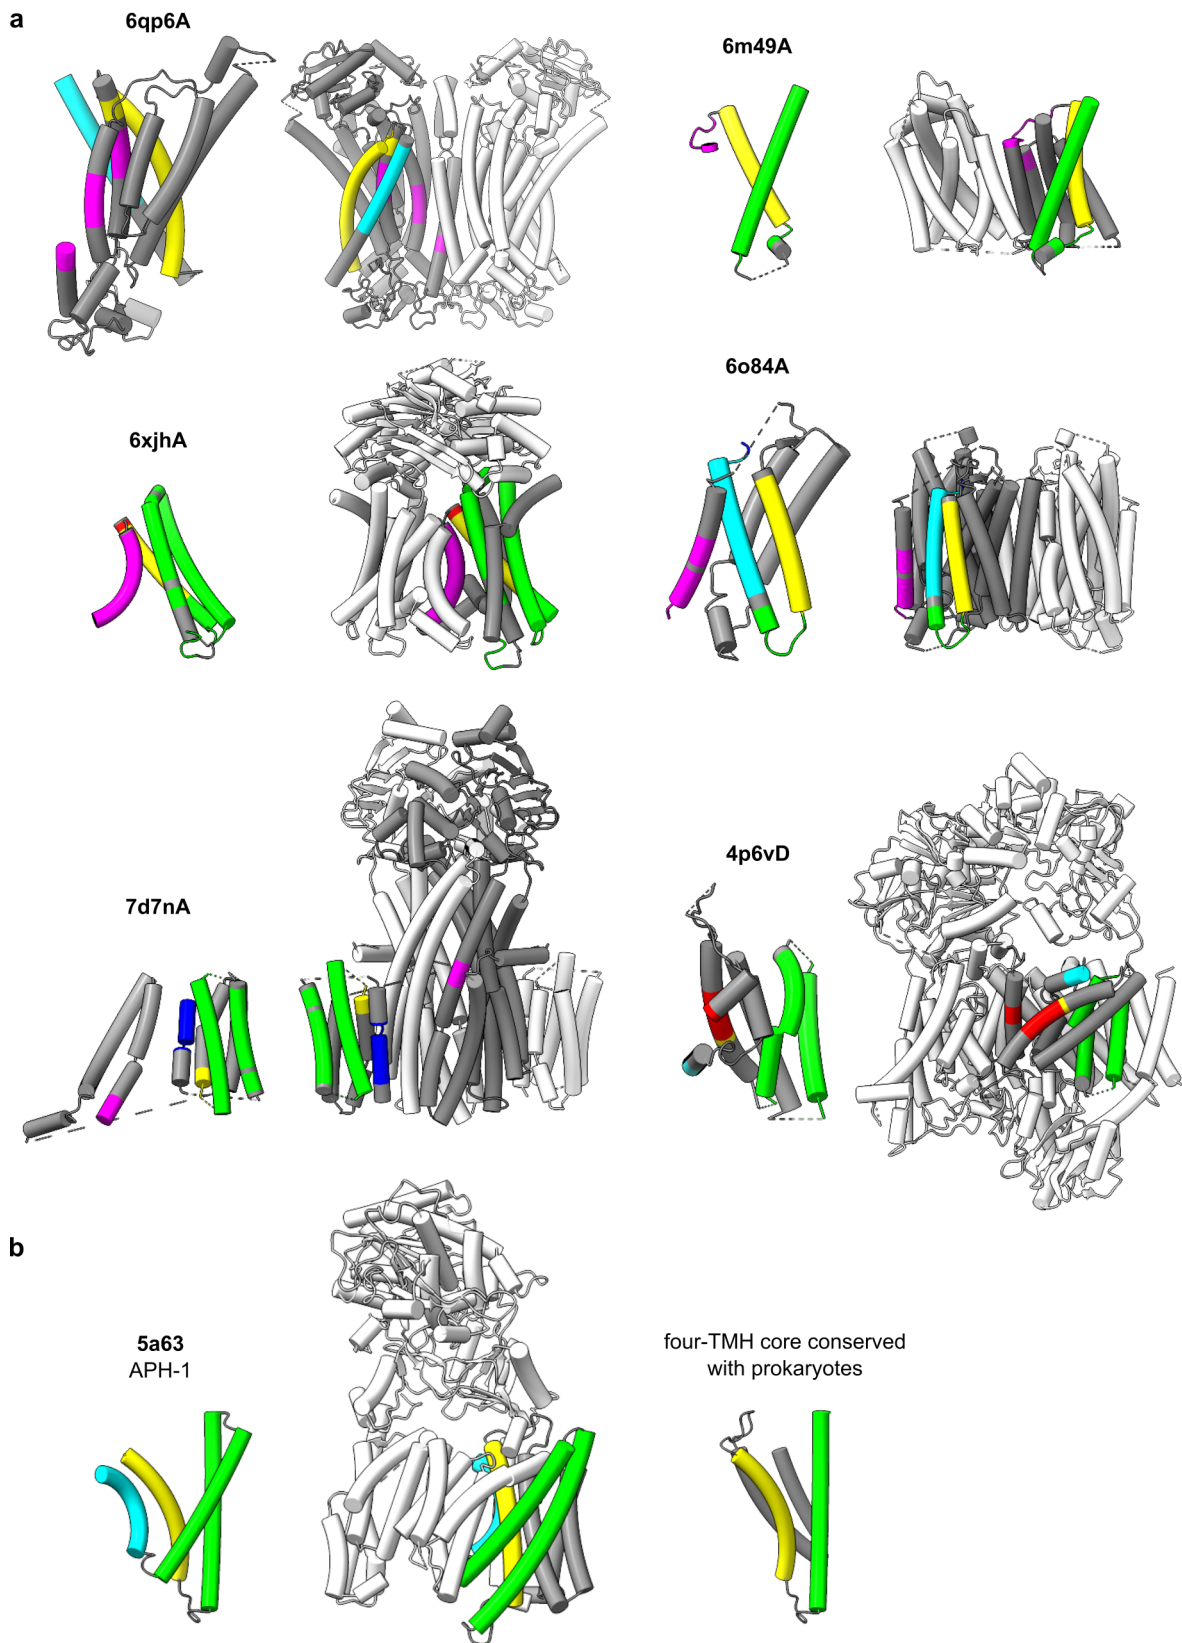

**Figure S2:** Structures of non-Oxa1 superfamily top Dali hits. **a** Isolated hits. The aligned chain is shown in grey, and any other chains in the model are shown in white. Regions of each hit are colour-coded according to which part of the query structure they aligned with, using the colour scheme from Figure 4. **b** The multiple hit APH-1. In addition to the representations shown in panel a, at right are shown the four TMHs conserved among APH-1's prokaryotic homologs. As in a, the non-aligned TMHs are shown in grey, and the two aligned TMHs are coloured.

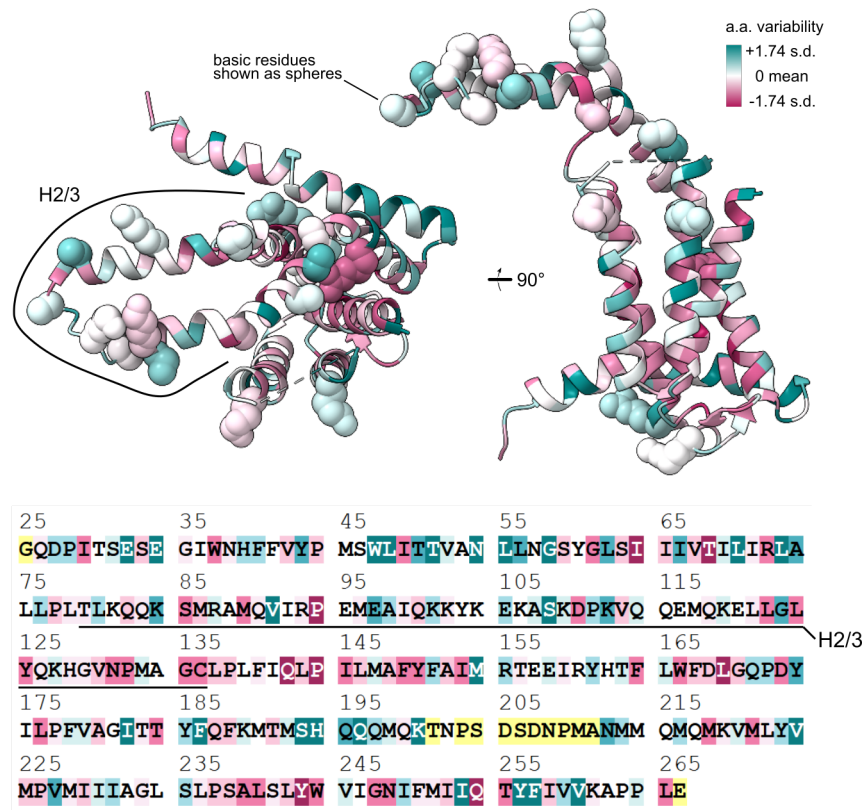

**Figure S3:** Amino acid conservation in bacterial YidC. The conservation scores and annotated sequence and PDB model shown (*B. halodurans* YidC2, 3wo7A) were retrieved from ConSurf-DB. The structure is colour-coded using the continuous scale shown, whereas the sequence is colour-coded on a similar but quantized scale. The scale shown encompasses the minimum but not maximum score.

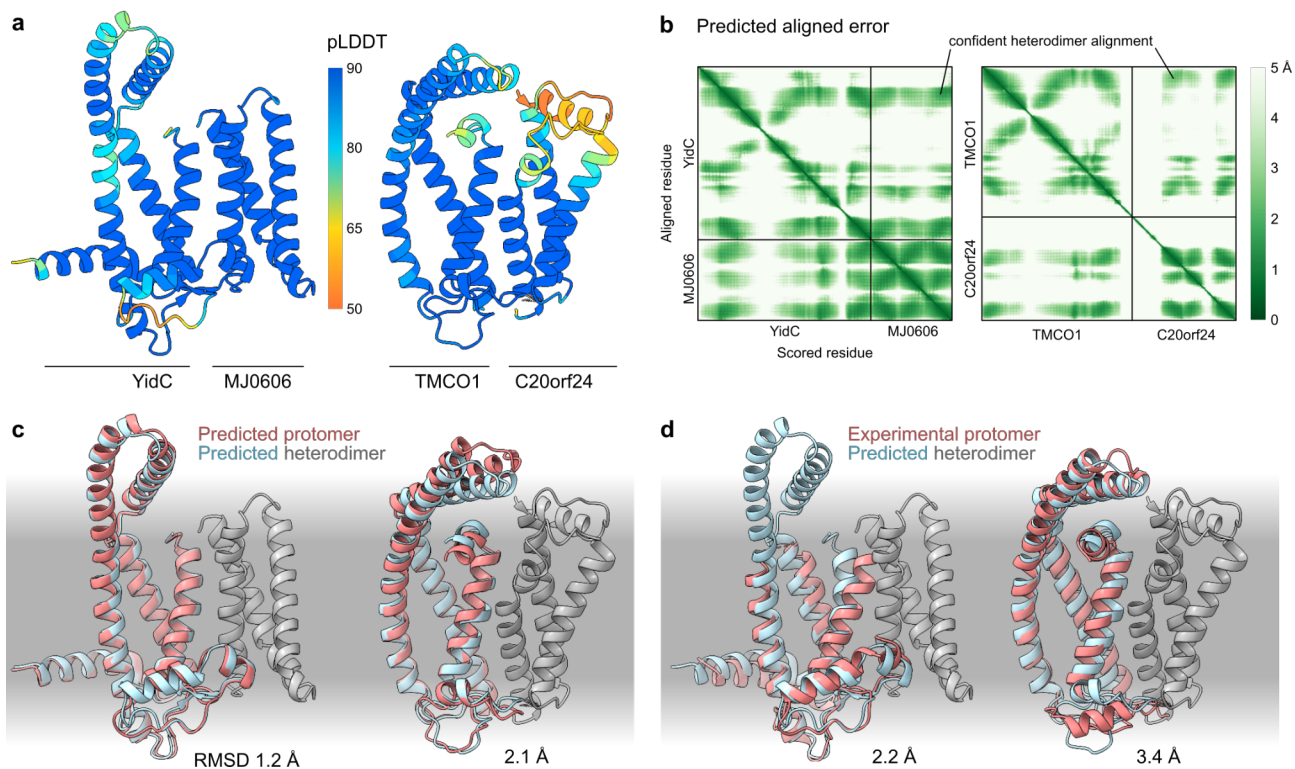

**Figure S4:** Structure and contact prediction for archaeal and human heterodimers homologous to EMC3/6. **a** Per-residue confidence scores (predicted local distance difference test, pLDDT) for the YidC a.k.a. MJ0480/MJ0606 and TMCO1/C20orf24 heterodimers. **b** Predicted aligned error. **c** Alignments showing the predicted structure for each heterodimer (light blue, grey) vs the predicted structure for the Oxa1 superfamily protomer alone (coral). **d** As in panel c except aligned vs experimentally determined structures for the Oxa1 superfamily protomer alone (YidC: 5c8j, TMCO1: 6w6l).

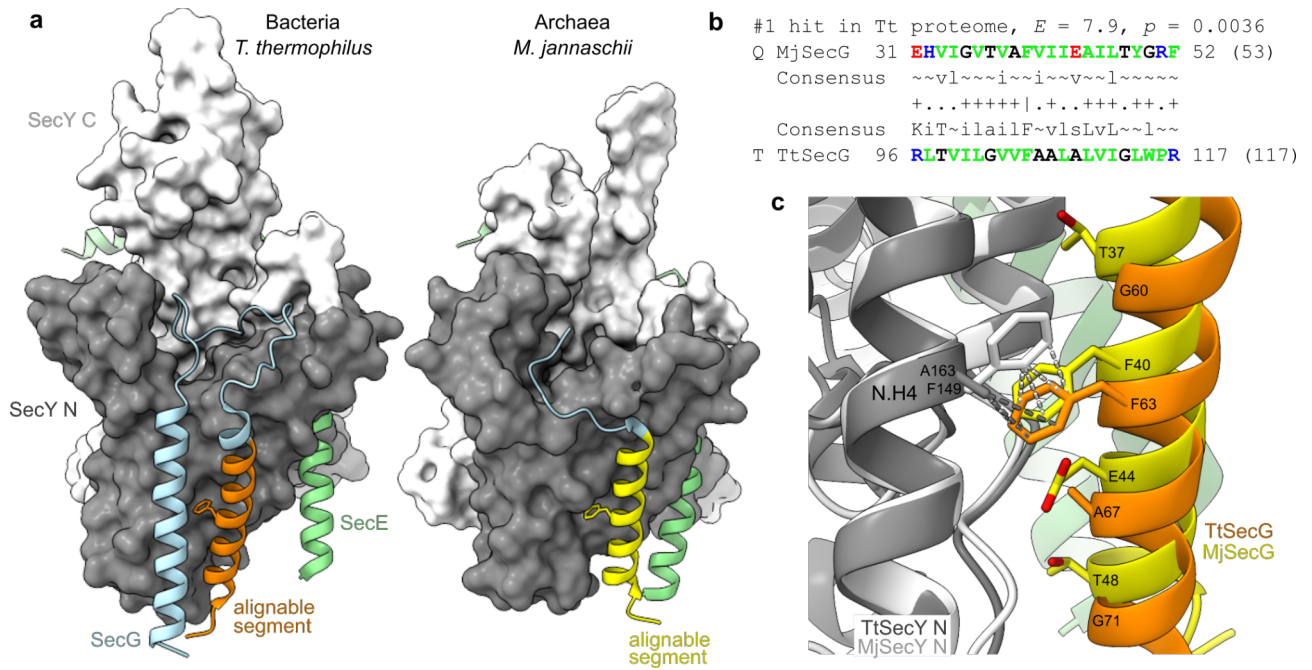

**Figure S5.** Similarity between archaeal and bacterial SecG. **a** *T. thermophilus* and *M. jannaschii* SecYEG, shown separately but oriented by aligning the two SecY TMs against which SecG packs (N.H1 and N.H4). The SecG subsequences identified as homologous by HHpred (panel **b**) are highlighted in orange and yellow. **b** The top hit from an HHpred query of the *T. thermophilus* proteome with *M. jannaschii* SecG. **c** The hydrophilic face of SecG and a conserved phenylalanine which contacts a specific residue in SecY N.H4.
